# Supplementary material
Source: PubMed Central journal article supplement (PMC4163749)
Supplement: NIHMS626000-supplement-01.pdf [file NIHMS626000-supplement-01.pdf]

## Supplemental Material

**Supplementary Figure 1: *Prickle2*<sup>-/-</sup> and *Prickle2*<sup>+/-</sup> mice display normal behavior in the open field, novel object recognition, and TMT assays.** (a) Open field assay. *Pk2*<sup>+/-</sup> and *Pk2*<sup>-/-</sup> mice display normal preference for the center of the chamber versus the periphery. They also show no difference in total locomotion. *Pk2*<sup>+/+</sup> n=8, *Pk2*<sup>+/-</sup> n=8, *Pk2*<sup>-/-</sup> n=8. Center: p>0.05, Periphery: p>0.05, Total locomotion: p>0.05. (b) Novel object recognition all p values >0.05 *Pk2*<sup>+/+</sup> n=16, *Pk2*<sup>+/-</sup> n=15, *Pk2*<sup>-/-</sup> n=15. (c) TMT evoked freezing. *Pk2*<sup>+/-</sup> and *Pk2*<sup>-/-</sup> mice show normal TMT evoked freezing *Pk2*<sup>-/-</sup> (p>0.5) *Pk2*<sup>+/-</sup> (p>0.05) (*Pk2*<sup>+/+</sup>, n=10; *Pk2*<sup>+/-</sup>, n=10; *Pk2*<sup>-/-</sup>, n=10); p>0.05. Error bars represent ± S.E.M. P values analyzed using students T-test.

**Supplementary Figure 2: Confirmation of rabbit anti-Prickle2 antibody and expression levels of hPk2-GFP constructs.** (a) Western blot analysis of *Pk2*<sup>+/+</sup> vs. *Pk2*<sup>-/-</sup> mouse brain lysate using rabbit anti-Pk2. For loading control, mouse anti-β-actin was used. *Pk2*<sup>-/-</sup> mice lack a Pk2 band thus confirming the specificity of rabbit anti-Pk2. (b) Representative western blot showing expression levels of Pk2-GFP constructs at 120 KD. Pk2-Flag is a size control at 93 KD, and GFP co-expression is at 27KD. (c) Total expression levels of hPk2-GFP for all transfections in cultured primary hippocampal neurons. hPk2-GFP, hPk2E8Q-GFP, and hPk2V153I-GFP are expressed at the same levels  $p > 0.05$ . Three replicates were used to quantify expression. T-test with Bonferroni's correction was used for statistical analysis.

**Supplementary Table 1: Coding variant alleles in *PRICKLE2*.** Rare (<1% MAF) coding variant alleles in *PRICKLE2* present in the Exome Variant Server and in the ARRA Autism Sequencing Collaboration datasets (all variants were found in the heterozygous state and 4 variants were found in both datasets). The total number of ASD individuals with rare missense *PRICKLE2* variants was significantly over represented ( $p=0.0001$ ) versus control as was the number of unique *PRICKLE2* missense variants in cases versus controls ( $p=0.0229$ ).

# Supplementary Figure 1



# Supplementary Figure 2

**a**



**b**



**c**



## Supplementary table1: Coding variant alleles in *PRICKLE2*

|                                                             | Exome Variant Server | ARRA Autism Sequencing Collaboration |
|-------------------------------------------------------------|----------------------|--------------------------------------|
| Total Alternative <i>PRICKLE2</i> Alleles (unique variants) | 77 (40)              | 29 (7)                               |
| Total <i>PRICKLE2</i> Alleles (individuals)                 | 13,004 (6,502)       | 822 (411)                            |
